# Supplementary material for: The long noncoding RNA SPRY4-IT1 increases the proliferation of human breast cancer cells by upregulating ZNF703 expression
Source: Springer Nature journal article supplement (doi:10.1186/s12943-015-0318-0), 2015-02-21
Supplement: MOESM5 [file 9762982]

Table 1. The Clinical Characteristics of the BC Patients

| Variables             | No. of cases | Relative SPRY4-IT1 expression |      |                      |
|-----------------------|--------------|-------------------------------|------|----------------------|
|                       |              | Low                           | High | P-value <sup>a</sup> |
| Age(years)            |              |                               |      | 0.241                |
| <45                   | 22           | 5                             | 17   |                      |
| ≥45                   | 26           | 10                            | 16   |                      |
| Maximum tumor size    |              |                               |      | 0.015*               |
| <2cm                  | 26           | 12                            | 14   |                      |
| ≥2cm                  | 22           | 3                             | 19   |                      |
| ER status             |              |                               |      | 0.005**              |
| Positive              | 18           | 10                            | 8    |                      |
| Negative              | 30           | 5                             | 25   |                      |
| Differentiation       |              |                               |      | 0.272                |
| Well, moderate        | 17           | 7                             | 10   |                      |
| Poor                  | 31           | 8                             | 23   |                      |
| No. of positive nodes |              |                               |      | 0.091                |
| <4                    | 30           | 12                            | 18   |                      |
| ≥4                    | 18           | 3                             | 15   |                      |
| Tumor stage           |              |                               |      | 0.017*               |
| I / II                | 23           | 11                            | 12   |                      |
| III / IV              | 25           | 4                             | 21   |                      |

<sup>a</sup> Chi-squared test. \* P<0.05 \*\* P<0.01
