# Supplementary material for: The long noncoding RNA SPRY4-IT1 increases the proliferation of human breast cancer cells by upregulating ZNF703 expression
Source: Springer Nature journal article supplement (doi:10.1186/s12943-015-0318-0), 2015-02-21
Supplement: MOESM6 [file 9762982]

Table 1 Sequence of primers and siRNA

| Gene name    | Forward (5'--3')                   | Reverse (5'--3')                    |
|--------------|------------------------------------|-------------------------------------|
| AMZ2         | ACACCCTCTCCAAACAAACG               | ACAGTAGCCCGTGAGCCATT                |
| ZYX          | CACCTCCTTCATCGTGGAC                | ACTCGCACAGTCTCATCTCG                |
| NOL6         | TCGGATTGATGCCTTCCTAC               | GCTGCCCAACAACAGTAACCT               |
| TCEB1        | TCGCCTCACCAGGAAACTAC               | CCTTCACAGCCACCATAGG                 |
| IQSEC1       | CTCCACTTCTTGCCTGAGC                | AAGCCATCCTGTGTGAATCC                |
| TMEM185B     | GCCTGTGTGGAGTTCAAAGC               | AAGACCAGCAGCCAGAAGTG                |
| HSP90B3P     | TTGAGAAGGCTGTGGTGTCT               | TTGCTCGTTTGGTATGCTTG                |
| GSDMB        | GTCTTTGGGTTCGGAGGATT               | GCGAGGGAGTTTAGCACATC                |
| SKA2         | TGGGAAATGCTGAAACTATGC              | TCCAAACATCCTGACACTCAA               |
| ZNF703       | CCCTCCAGCATTGGCTACC                | CAATAGGGGTCGCGGCATAAT               |
| GAPDH        | GACTCATGACCACAGTCCATGC             | AGAGGCAGGGATGATGTTCTG               |
| SPRY4-IT1    | TAAGCTTGTAGAGATGGGGGTTTCATCCTGTTGG | ACTCGAGAAAGACTCCCTTTTCTTAAGCAGATTAC |
| si-SPRY4-IT1 | CCCAGAATGTTGACAGCTGCCTCTT          |                                     |
| si-ZNF703    | CCACACACUUUGGGCCUAA                |                                     |
